# Supplementary material for: Drought stress promotes the colonization success of a herbivorous mite that manipulates plant defenses
Source: PubMed Central journal article supplement (PMC5727147; doi:10.1007/s10493-017-0200-4), 2017-11-29

## Drought stress promotes the colonization success of a herbivorous mite that manipulates plant defences

Miguel G. Ximénez-Embún, Joris J. Glas, Felix Ortego, Juan M. Alba, Pedro Castañera, Merijn R. Kant

### Supplementary data

**Supplementary Table S1.** Summary of analytical methods to assess the inhibitory activity of plant protein extracts <sup>1</sup>

| Commercial enzyme <sup>2</sup>                              | Substrate <sup>3</sup>                     | Buffer <sup>4</sup>                                                             | Incubation      | Measurement <sup>5</sup>                           |
|-------------------------------------------------------------|--------------------------------------------|---------------------------------------------------------------------------------|-----------------|----------------------------------------------------|
| Cathepsin B from bovine spleen (EC 3.4.22.1)                | Z-RR-AMC                                   | 100 mM NA phosphate, pH 6.0 (10 mM L-cysteine, 10 mM EDTA, 0.01% (v/v) Brij 35) | 1 h at 28 °C    | excitation filter 350 nm<br>emission filter 465 nm |
| Papain from <i>Carica papaya</i> (EC 3.4.22.2)              | Z-FR-AMC                                   | 100 mM Na phosphate, pH 6.0 (10 mM L-cysteine, 10 mM EDTA, 0.01% (v/v) Brij 35) | 1 h at 28 °C    | excitation filter 350 nm<br>emission filter 465 nm |
| Cathepsin D from bovine spleen (EC 3.4.23.5)                | MocAc-GKPILFFRLK (Dnp)-D-R-NH <sub>2</sub> | 100 mM sodium citrate, pH 3.5 (0.15M NaCl, 5 mM MgCl <sub>2</sub> )             | 10 min at 30 °C | excitation filter 328 nm<br>emission filter 393 nm |
| Trypsin from bovine pancreas (EC 3.4.21.4),                 | Z-LA-AMC                                   | 100 mM Tris-HCl, pH 7.5 (0.15M NaCl, 5 mM MgCl <sub>2</sub> )                   | 1 h at 35 °C    | excitation filter 350 nm<br>emission filter 465 nm |
| $\alpha$ -Chymotrypsin from bovine pancreas (EC 3.4.21.1),  | SucAAPF-AMC                                | 100 mM Tris-HCl, pH 7.5 (0.15M NaCl, 5 mM MgCl <sub>2</sub> )                   | 1 h at 35 °C    | excitation filter 350 nm<br>emission filter 465 nm |
| Leucine aminopeptidase from porcine pancreas (EC 3.4.11.1). | LpNa                                       | 100 mM Tris-HCl, pH 8 (0.15M NaCl, 5 mM MgCl <sub>2</sub> )                     | 1 h at 30 °C    | absorbance at 410 nm                               |

<sup>1</sup> Procedures adapted from Ximénez-Embún et al. (2016). Samples of 20  $\mu$ g of plant protein extracts (40  $\mu$ g in case of leucine aminopeptidase) were preincubated for 10 min with 100 ng of the commercial enzyme.

<sup>2</sup> All purchased from Sigma-Aldrich (St Luis, USA).

<sup>3</sup> The substrates were added at a final concentration of 20  $\mu$ M. Z-RR-AMC (N-carbobenzoxylxy-Arg-Arg-7-amido-4-methylcoumarin) for cathepsin B, Z-FR-AMC (N-carbobenzoxylxy-Phe-Arg-7-amido-4-methylcoumarin) for papain, Z-LA-AMC (Z-L-Arg-7-amido-4-methylcoumarin) for trypsin, SucAAPF-AMC (Suc-Ala-Ala-Pro-Phe-7-amido-4-methylcoumarin) for chymotrypsin, all purchased from Calbiochem (MerkMilipore, Billerica, USA), MocAc-GKPILFFRLK(Dnp)-D-R-NH<sub>2</sub> from Peptanova (Germany) for cathepsin D, and LpNa (L-leucine p-nitroanilide) from Sigma-Aldrich (St Luis, USA) for leucine aminopeptidase.

<sup>4</sup> Concentrations are expressed at molarity in the reaction mixture.

<sup>5</sup> AMC (7-amino-4-methylcoumarin) (Bachem, Swizerland) as standard for all fluorescent substrates, except MCA (MoCAC-Pro-Leu-Gly) (Peptanova GmbH, Germany) for cathepsin D. Double blanks were used to account for spontaneous breakdown of substrates and the plant protease activity, and all assays were done in duplicate.

**Supplementary Table S2** Parameters used for detection of phytohormones and related compounds by LC-MS/MS

| <b>Compound</b>                             | <b>Molecular ion [M-H]<br/>(<i>m/z</i>)</b> | <b>Fragment ion<br/>(<i>m/z</i>)</b> |
|---------------------------------------------|---------------------------------------------|--------------------------------------|
| <b>OPDA</b>                                 | 291                                         | 165                                  |
| <b>JA</b>                                   | 209                                         | 59                                   |
| <b>D<sub>5</sub>-JA (Internal Standard)</b> | 213                                         | 61                                   |
| <b>JA-Ile</b>                               | 322                                         | 130                                  |
| <b>SA</b>                                   | 137                                         | 93                                   |
| <b>D<sub>6</sub>-SA (Internal Standard)</b> | 141                                         | 97                                   |
| <b>ABA</b>                                  | 263                                         | 153                                  |

**Supplementary Table S3** Nucleotide sequence of primers used for qRT-PCR analysis

| <b>Target Gene</b>   | <b>Name</b>                            | <b>GenBank (GB) accession</b> | <b>Gen Model ITAG2.3:</b> | <b>Forward Primer 5' → 3'</b> | <b>Reverse Primer 5' → 3'</b> |
|----------------------|----------------------------------------|-------------------------------|---------------------------|-------------------------------|-------------------------------|
| <b><i>PPO-F</i></b>  | <i>Polyphenol-oxidase-F</i>            | AK247126.1                    | Solyc08g074630.1.1        | CGGAGTTTGCAGGGAGTTATAC        | TTGATCTCCACACTTTCAATGG        |
| <b><i>JIP-21</i></b> | <i>Jasmonate-inducible protein 21</i>  | AJ295638.1                    | Solyc03g098790.1.1        | ACTCGTCCTGTGCTTTGTCC          | CCCAAGAGGATTTTCGTTGA          |
| <b><i>TD2</i></b>    | <i>Threonine Deaminase-2</i>           | M61915.1                      | Solyc09g008670.2.1        | TGCCGTTAAAAATGTCACCA          | ACTGGCGATGCCAAAATATC          |
| <b><i>PI-IIf</i></b> | <i>Proteinase Inhibitor II f</i>       | AY129402.1                    | Solyc03g020080.2.1        | GACAAGGTACTAGTAATCAAT TATCC   | GGGCATATCCCGAACCCAAG A        |
| <b><i>PR-P6</i></b>  | <i>Pathogenesis-related protein P6</i> | M69248.1                      | Solyc00g174340.1.1        | GTACTGCATCTTCTTGTTTCCA        | TAGATAAGTGCTTGATGTCC A        |
| <b><i>Actin</i></b>  | <i>Actin</i>                           | XM_004235020.1                | Solyc03g078400.2.1        | TTAGCACCTTCCAGCAGATGT         | AACAGACAGGACACTCGCA CT        |

**Supplementary Table S4** Results of the three-way ANOVA analysis.

|                                                              | <b>Drought</b> |           |          | <b>TRM</b> |           |          | <b>Time</b> |           |          | <b>Drought*TRM<sup>a</sup></b> |           |              |
|--------------------------------------------------------------|----------------|-----------|----------|------------|-----------|----------|-------------|-----------|----------|--------------------------------|-----------|--------------|
|                                                              | <b>F</b>       | <b>df</b> | <b>p</b> | <b>F</b>   | <b>df</b> | <b>p</b> | <b>F</b>    | <b>df</b> | <b>p</b> | <b>F</b>                       | <b>df</b> | <b>p</b>     |
| <b>Mite population growth experiment</b>                     |                |           |          |            |           |          |             |           |          |                                |           |              |
| <b>Stomatal conductance</b>                                  | 35.6           | 1,57      | <0.001   | 4.09       | 1,57      | 0.06     | 421         | 2,57      | <0.001   | 0.01                           | 1,57      | 0.947        |
| <b>Stem length</b>                                           | 10.6           | 1,57      | <0.001   | 0.023      | 1,57      | 0.876    | 12.9        | 1,57      | <0.001   | 0.31                           | 1,57      | 0.578        |
| <b>Plant sampling and plant damage evaluation experiment</b> |                |           |          |            |           |          |             |           |          |                                |           |              |
| <b>Stomatal conductance</b>                                  | 4.42           | 1,55      | <0.001   | 0.965      | 1,55      | 0.387    | 18.1        | 1,55      | <0.001   | 2.10                           | 1,55      | 0.153        |
| <b>Stem length</b>                                           | 193            | 1,55      | <0.001   | 1.382      | 1,55      | 0.246    | 290         | 1,55      | <0.001   | 8.30                           | 1,55      | <b>0.006</b> |

<sup>a</sup>From the different possible interactions between factors only the one studied is presented

Supplementary Figure S5 Results of the two-way ANOVA analysis.

|                                  | Moderate drought |      |                  | TRM    |      |                  | Drought*TRM |      |              |
|----------------------------------|------------------|------|------------------|--------|------|------------------|-------------|------|--------------|
|                                  | F                | df   | <i>p</i>         | F      | df   | <i>p</i>         | F           | df   | <i>p</i>     |
| <b>Nutrients</b>                 |                  |      |                  |        |      |                  |             |      |              |
| Free sugars                      | 10.35            | 1,20 | <b>0.004</b>     | 1.275  | 1,20 | 0.272            | 5.915       | 1,20 | <b>0.024</b> |
| Protein                          | 0.139            | 1,20 | 0.714            | 20.47  | 1,20 | <b>&gt;0.001</b> | 0.148       | 1,20 | 0.705        |
| Total free aa                    | 5.074            | 1,20 | <b>0.036</b>     | 0.66   | 1,20 | 0.426            | 0.229       | 1,20 | 0.642        |
| <b>Non-essential amino acids</b> |                  |      |                  |        |      |                  |             |      |              |
| Asp                              | 13.020           | 1,20 | <b>0.002</b>     | 0.450  | 1,20 | 0.510            | 0.006       | 1,20 | 0.940        |
| Thr                              | 0.461            | 1,20 | 0.505            | 2.676  | 1,20 | 0.117            | 0.293       | 1,20 | 0.594        |
| Ser                              | 12.927           | 1,20 | <b>0.002</b>     | 2.510  | 1,20 | 0.129            | 0.004       | 1,20 | 0.949        |
| Glu                              | 0.839            | 1,20 | 0.371            | 0.927  | 1,20 | 0.347            | 1.965       | 1,20 | 0.176        |
| Gly                              | 4.041            | 1,20 | 0.058            | 3.643  | 1,20 | 0.071            | 0.024       | 1,20 | 0.878        |
| Ala                              | 19.703           | 1,20 | <b>0.000</b>     | 1.274  | 1,20 | 0.272            | 0.354       | 1,20 | 0.558        |
| Cys                              | 1.978            | 1,20 | 0.175            | 9.331  | 1,20 | <b>0.006</b>     | 0.008       | 1,20 | 0.929        |
| Pro                              | 0.976            | 1,20 | 0.335            | 9.218  | 1,20 | <b>0.007</b>     | 0.524       | 1,20 | 0.477        |
| <b>Essential amino acids</b>     |                  |      |                  |        |      |                  |             |      |              |
| Val                              | 0.022            | 1,20 | 0.882            | 18.315 | 1,20 | <b>0.000</b>     | 0.04        | 1,20 | 0.844        |
| Met                              | 3.219            | 1,20 | 0.088            | 3.201  | 1,20 | 0.089            | 0.924       | 1,20 | 0.348        |
| Ile                              | 3.555            | 1,20 | 0.074            | 14.763 | 1,20 | <b>0.001</b>     | 0.372       | 1,20 | 0.549        |
| Leu                              | 6.472            | 1,20 | <b>0.019</b>     | 39.416 | 1,20 | <b>0.000</b>     | 0.038       | 1,20 | 0.848        |
| Tyr                              | 9.716            | 1,20 | <b>0.005</b>     | 71.310 | 1,20 | <b>0.000</b>     | 1.599       | 1,20 | 0.221        |
| Phe                              | 2.436            | 1,20 | 0.134            | 3.545  | 1,20 | 0.074            | 0.305       | 1,20 | 0.587        |
| His                              | 5.342            | 1,20 | <b>0.032</b>     | 1.289  | 1,20 | 0.270            | 3.358       | 1,20 | 0.082        |
| lys                              | 1.683            | 1,20 | 0.209            | 17.287 | 1,20 | <b>0.000</b>     | 0.71        | 1,20 | 0.410        |
| Arg                              | 4.809            | 1,20 | <b>0.040</b>     | 26.030 | 1,20 | <b>0.000</b>     | 0.24        | 1,20 | 0.630        |
| <b>Phytohormones</b>             |                  |      |                  |        |      |                  |             |      |              |
| OPDA                             | 0.026            | 1,39 | 0.871            | 36     | 1,39 | <b>&lt;0.001</b> | 3.560       | 1,39 | 0.067        |
| JA                               | 6.02             | 1,39 | <b>0.019</b>     | 9.812  | 1,39 | <b>0.003</b>     | 0.219       | 1,39 | 0.642        |
| JA-Ile                           | 0.955            | 1,39 | 0.334            | 10.76  | 1,39 | <b>0.002</b>     | 0.565       | 1,39 | 0.457        |
| ABA                              | 8.04             | 1,39 | <b>0.007</b>     | 0.195  | 1,39 | 0.661            | 0.228       | 1,39 | 0.636        |
| SA                               | 12.48            | 1,39 | <b>0.001</b>     | 95.88  | 1,39 | <b>&lt;0.001</b> | 8.941       | 1,39 | <b>0.005</b> |
| <b>Gene expression</b>           |                  |      |                  |        |      |                  |             |      |              |
| <i>TD-II</i>                     | 3.330            | 1,16 | 0.087            | 11.14  | 1,16 | <b>0.004</b>     | 1.160       | 1,16 | 0.297        |
| <i>PPO-F</i>                     | 7.566            | 1,15 | <b>0.015</b>     | 4.965  | 1,15 | <b>0.042</b>     | 1.887       | 1,15 | 0.120        |
| <i>JIP-21</i>                    | 5.200            | 1,16 | <b>0.036</b>     | 5.203  | 1,16 | <b>0.036</b>     | 0.288       | 1,16 | 0.599        |
| <i>PI-II<math>\beta</math></i>   | 0.208            | 1,16 | 0.654            | 0.273  | 1,16 | 0.608            | 0.005       | 1,16 | 0.943        |
| <i>PR-P6</i>                     | 1.543            | 1,16 | 0.232            | 41.24  | 1,16 | <b>&lt;0.001</b> | 1.054       | 1,16 | 0.320        |
| <b>Defense proteins</b>          |                  |      |                  |        |      |                  |             |      |              |
| Cathepsin B                      | 0.209            | 1,20 | 0.653            | 144.1  | 1,20 | <b>&lt;0.001</b> | 4.386       | 1,20 | 0.0499       |
| Papain                           | 3.481            | 1,20 | 0.0776           | 42.3   | 1,20 | <b>&lt;0.001</b> | 2.632       | 1,20 | 0.1212       |
| Cathepsin D                      | 1.708            | 1,20 | 0.2069           | 1.1    | 1,20 | 0.302            | 0.104       | 1,20 | 0.7507       |
| Trypsin                          | 5.673            | 1,20 | <b>0.028</b>     | 2.8    | 1,20 | 0.113            | 0.021       | 1,20 | 0.8873       |
| Chymotrypsin                     | 23.54            | 1,20 | <b>&lt;0.001</b> | 6.1    | 1,20 | <b>0.023</b>     | 1.904       | 1,20 | 0.1836       |
| Aminopeptidase                   | 0.059            | 1,20 | 0.8114           | 2.3    | 1,20 | 0.149            | 1.398       | 1,20 | 0.2517       |
| Polyphenol oxidases              | 8.393            | 1,20 | <b>0.009</b>     | 3.756  | 1,20 | 0.0676           | 0.664       | 1,20 | 0.4254       |
| Peroxidases                      | 16.46            | 1,20 | <b>&lt;0.001</b> | 29.38  | 1,20 | <b>&lt;0.001</b> | 0.014       | 1,20 | 0.9082       |
|                                  | F                | df   | <i>p</i>         | F      | df   | <i>p</i>         | F           | df   | <i>p</i>     |
|                                  | Drought          |      |                  | TRM    |      |                  | Drought*TRM |      |              |

Supplementary Figure S1 Leaf damage index explanation

Leaf damage index

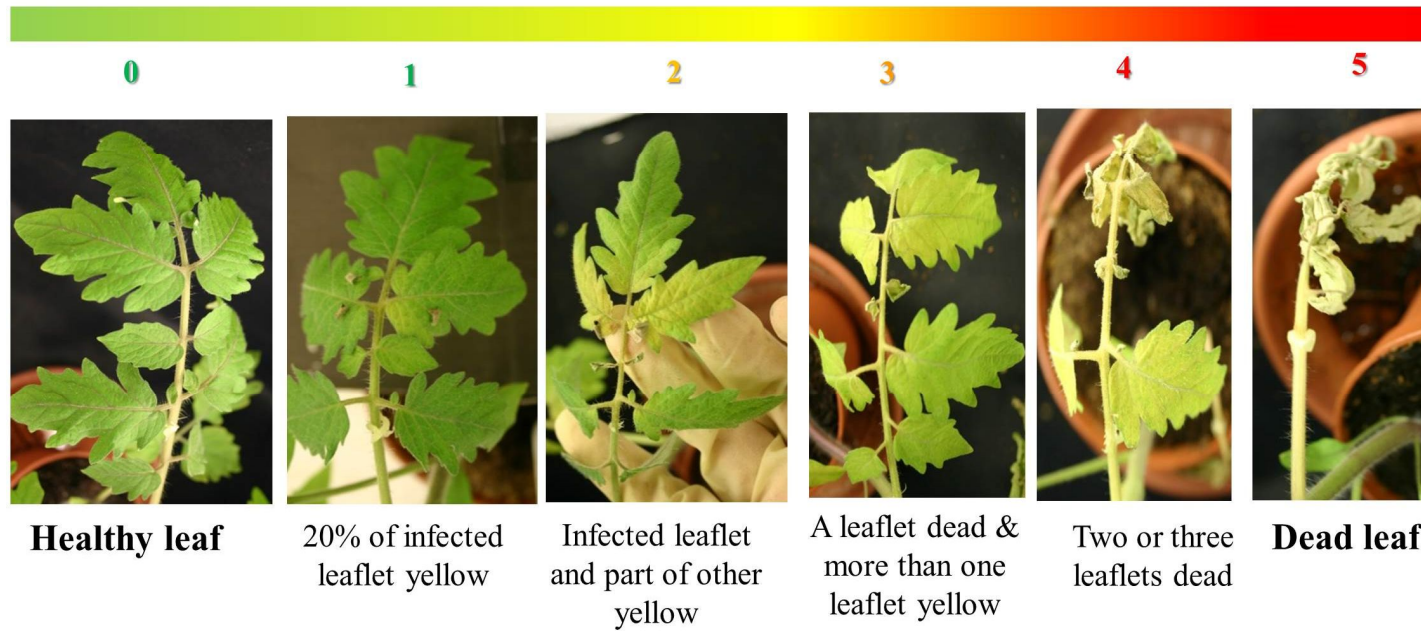

**Supplementary Figure S2** Effect of moderate drought on A) tomato stomatal conductance (gs) and B) stem length at mite infestation (mi) at 7 and 14 days post infestation (dpi). Data (mean  $\pm$  SE) are average of the values on infested and non-infested w.t. plants on TRM population growth and plant material experiments, as mite infestation didn't show a significant effect. An asterisk indicates a significant difference between drought and control treatments at each time (Three-way ANOVA, Bonferroni *post hoc* test,  $p < 0.05$ ).

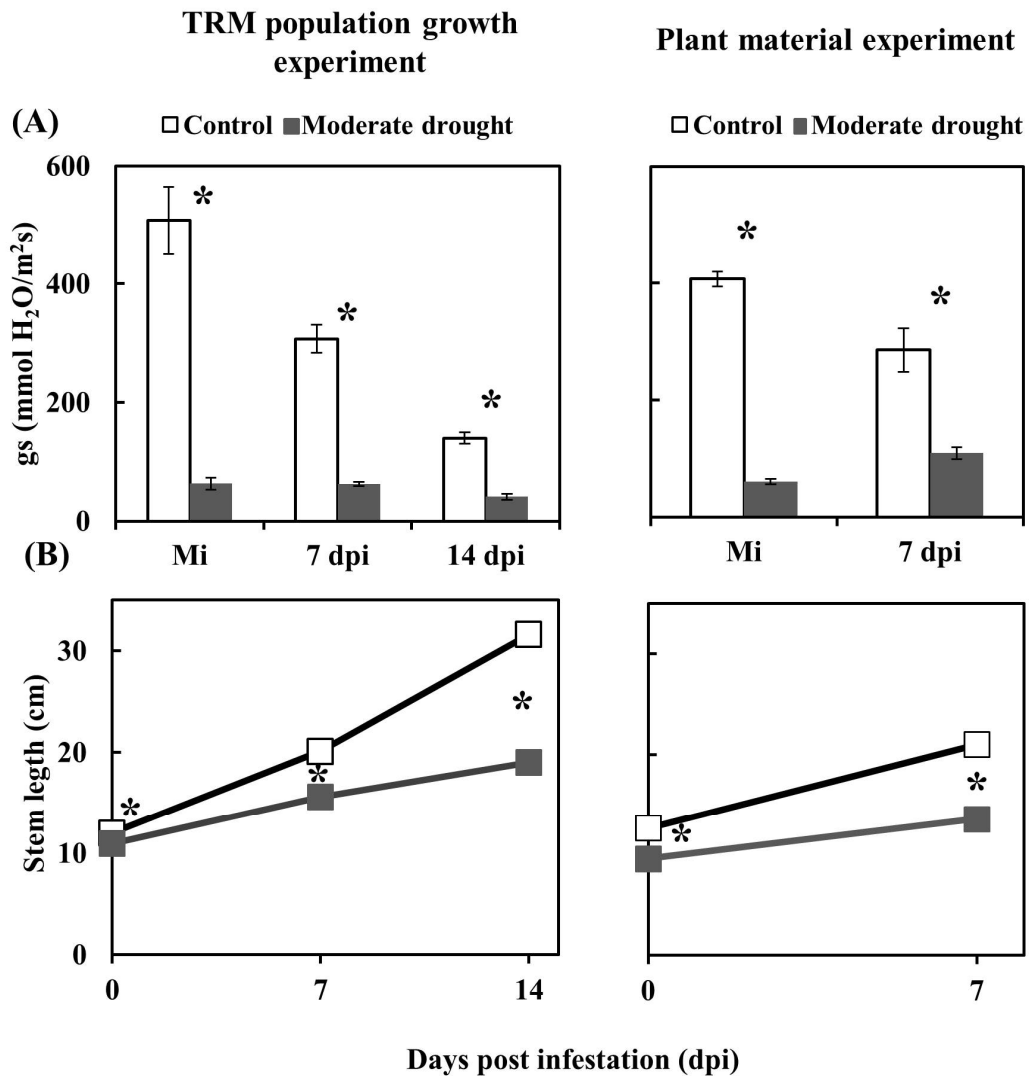

Supplement: 10493_2017_200_MOESM1_ESM.pdf [file 10493_2017_200_MOESM1_ESM.pdf]
